# Supplementary material for: Mismatch repair deficient hematopoietic stem cells are preleukemic stem cells
Source: PubMed Central journal article supplement (PMC5540588; doi:10.1371/journal.pone.0182175), 2017-08-02
Supplement: pone.0182175.s002.pdf [file pone.0182175.s002.pdf]

## S2 Fig

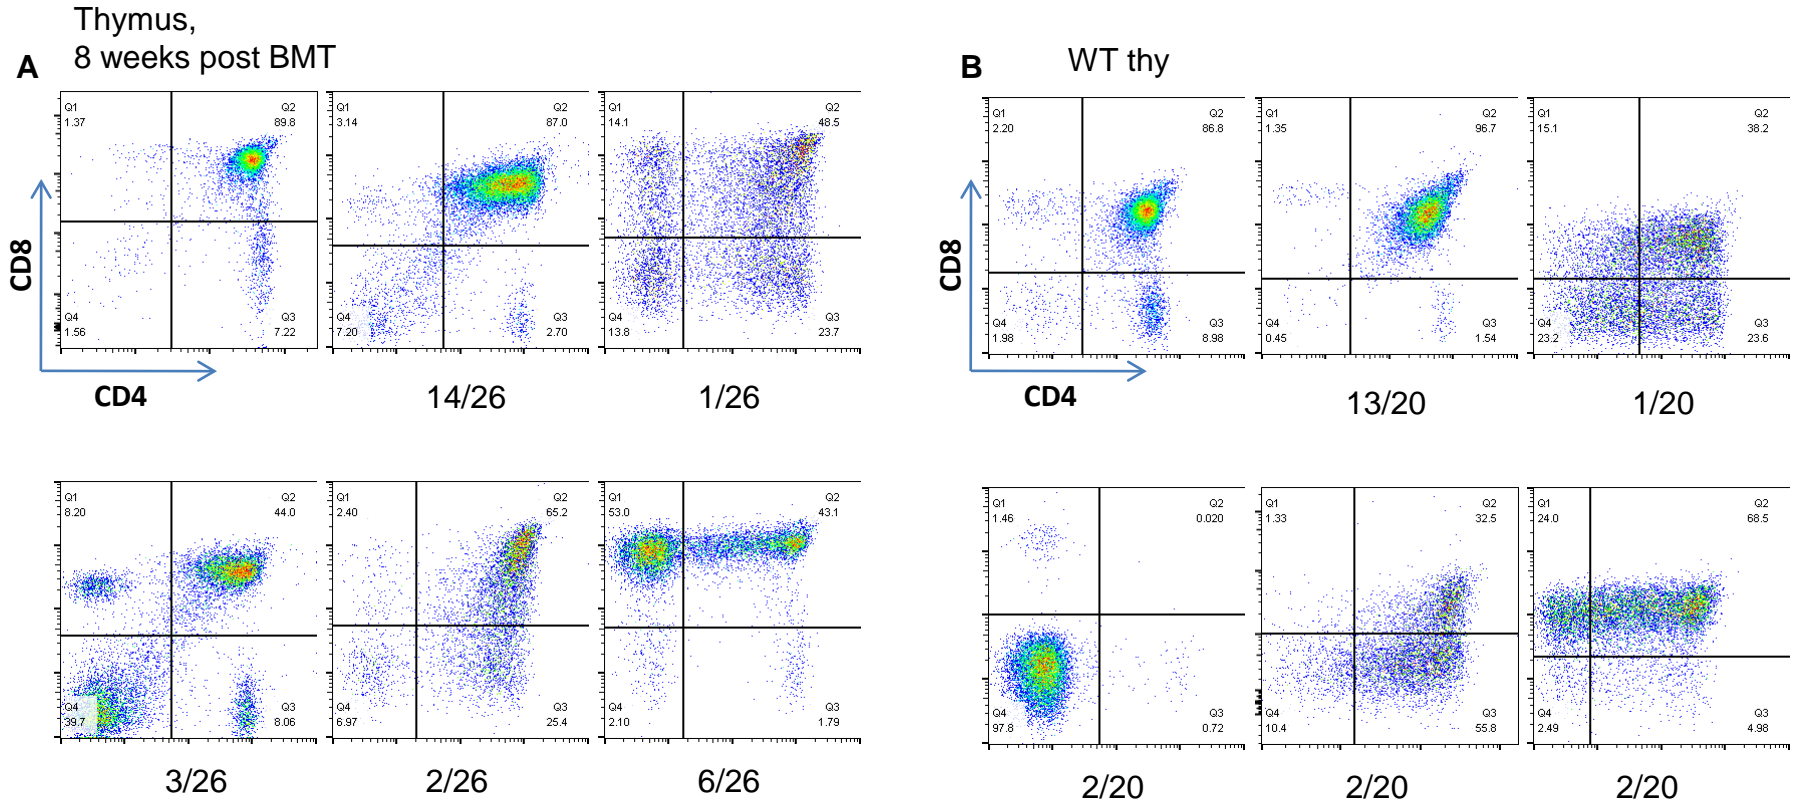

**S2 Fig. Lymphoma Characterization in the recipients of MSH2<sup>-/-</sup> BMT (A) and MSH2<sup>-/-</sup> Mice (B).** A total of 26 thymic lymphomas in the recipients of MSH2<sup>-/-</sup> BMT (A) and 20 lymphomas in MSH2<sup>-/-</sup> mice (B) were analyzed by flow cytometry using CD4 and CD8 antibodies. The numbers under each graph indicate the proportion of lymphomas showing similar CD4/CD8 expression profiles. The upper left graph in each panel is representative of a normal thymus from MSH2<sup>-/-</sup> BMT (A) or WT mouse (B). Note: the gating may not be based on a singular standard, since this is a long-turn experiments, the samples were analyzed at different times.
