# Supplementary material for: Mismatch repair deficient hematopoietic stem cells are preleukemic stem cells
Source: PubMed Central journal article supplement (PMC5540588; doi:10.1371/journal.pone.0182175), 2017-08-02
Supplement: pone.0182175.s003.pdf [file pone.0182175.s003.pdf]

S3 Fig

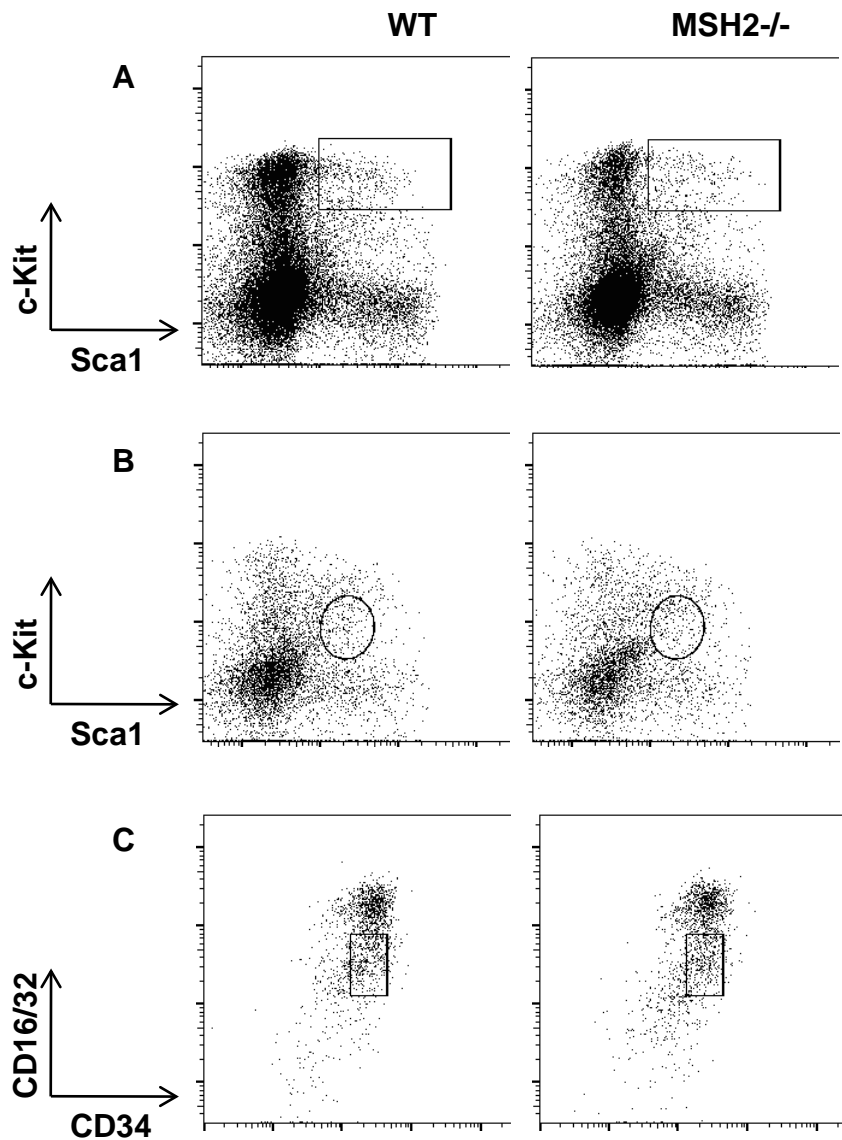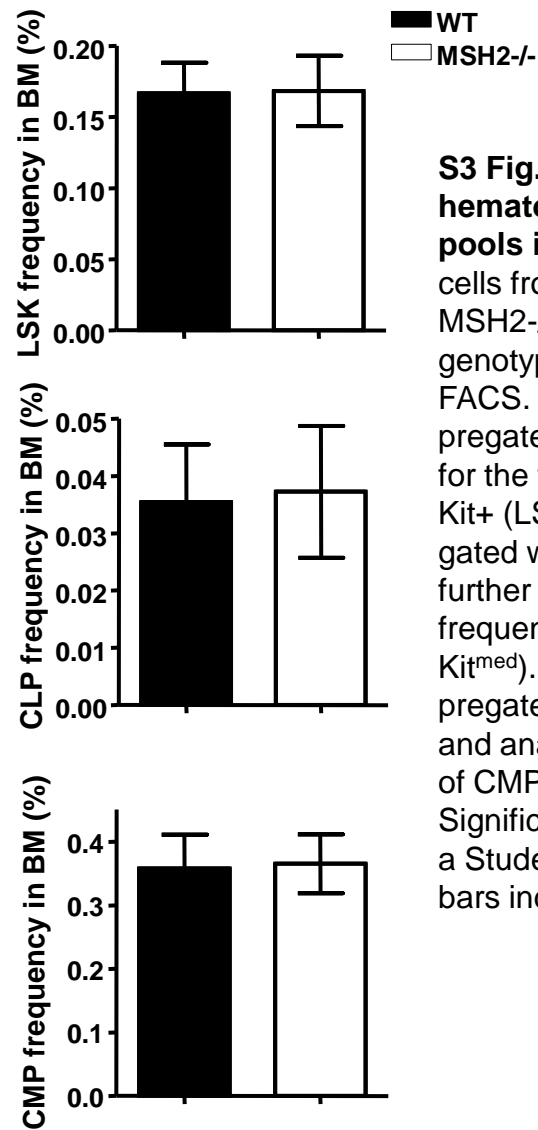

**S3 Fig. Characterization of hematopoietic progenitor pools in MSH2-/- mice.** BM cells from age-matched WT and MSH2-/- mice (n=6 each genotype) were analyzed by FACS. (A). BM cells were pregated for Lin-, and analyzed for the frequencies of Sca1+, c-Kit+ (LSK). (B). BM cells were gated with Lin-, CD127+, and further analyzed for the frequency of CLP (Sca1<sup>med</sup>, c-Kit<sup>med</sup>). (C). BM cells were pregated for Lin-, Sca1-, c-Kit+, and analyzed for the frequencies of CMP (CD34<sup>+/low</sup>CD16/32<sup>int</sup>). Significance was determined by a Student's 2-tailed t test. Error bars indicate the SD.
