# Supplementary material for: Mismatch repair deficient hematopoietic stem cells are preleukemic stem cells
Source: PubMed Central journal article supplement (PMC5540588; doi:10.1371/journal.pone.0182175), 2017-08-02
Supplement: pone.0182175.s005.pdf [file pone.0182175.s005.pdf]

S5 Fig

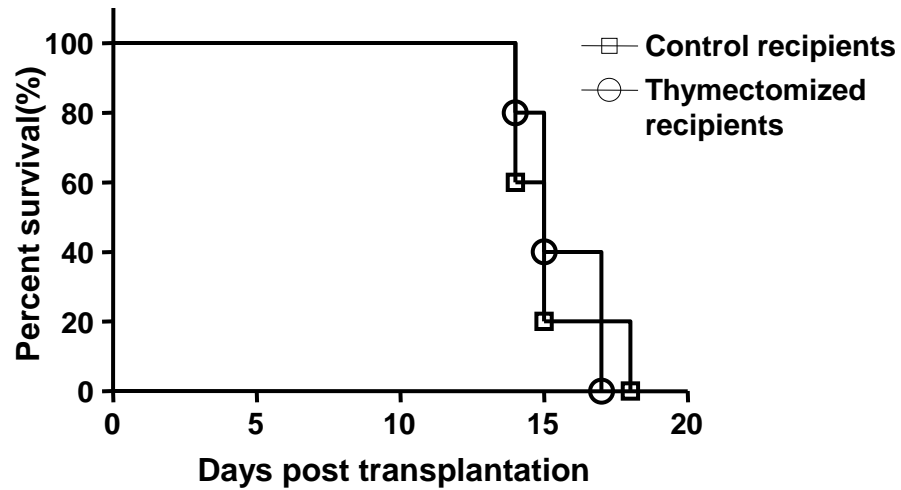

**S5 Fig. Lymphoma development in the secondary thymectomized recipients.**  $4 \times 10^4$  lymphoma cells were transplanted into sublethally irradiated WT control and thymectomized recipients (n=5 per group). Lymphoma development in the recipients was monitored. Similar results were obtained in three independent experiments.
