# Supplementary material for: Mismatch repair deficient hematopoietic stem cells are preleukemic stem cells
Source: PubMed Central journal article supplement (PMC5540588; doi:10.1371/journal.pone.0182175), 2017-08-02
Supplement: pone.0182175.s006.pdf [file pone.0182175.s006.pdf]

S6 Fig

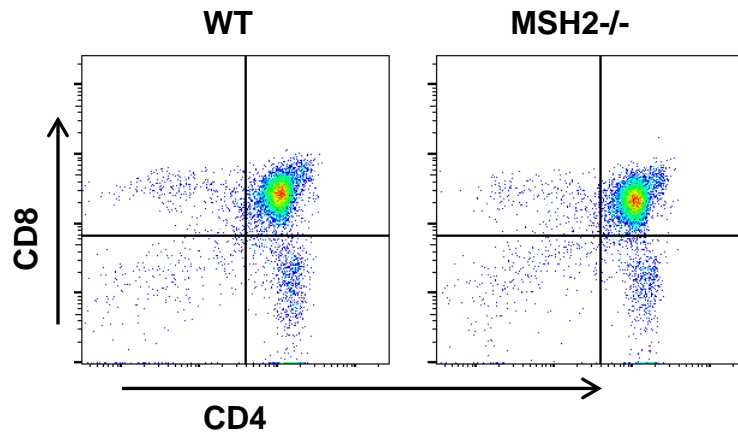

**S6 Fig. T cell composition in the thymus of MSH2-/- mice post transplantation.** BM cells from BoyJ mice were transplanted into WT or MSH2-/- mice as described in Figure 5. 8 weeks after transplantation, recipient mice (n=5 per group) were sacrificed, thymus tissues were dissected, single cell suspension was prepared, and the expression of CD4 and CD8 on the thymocytes was analyzed by flow cytometry.
